# Supplementary material for: African swine fever virus encodes for an E2-ubiquitin conjugating enzyme that is mono- and di-ubiquitinated and required for viral replication cycle
Source: PubMed Central journal article supplement (PMC5823848; doi:10.1038/s41598-018-21872-2), 2018-02-22

**African swine fever virus encodes for an E2-ubiquitin conjugating enzyme that is mono- and di-ubiquitinated and required for viral replication cycle**

Ferdinando B. Freitas, Gonçalo Frouco, Carlos Martins, Fernando Ferreira

**Supplemental Materials**

**SUPPLEMENTARY FIGURE S1** - Binding parameters of ASFV E2-ubiquitin conjugating enzyme, full-length blots.

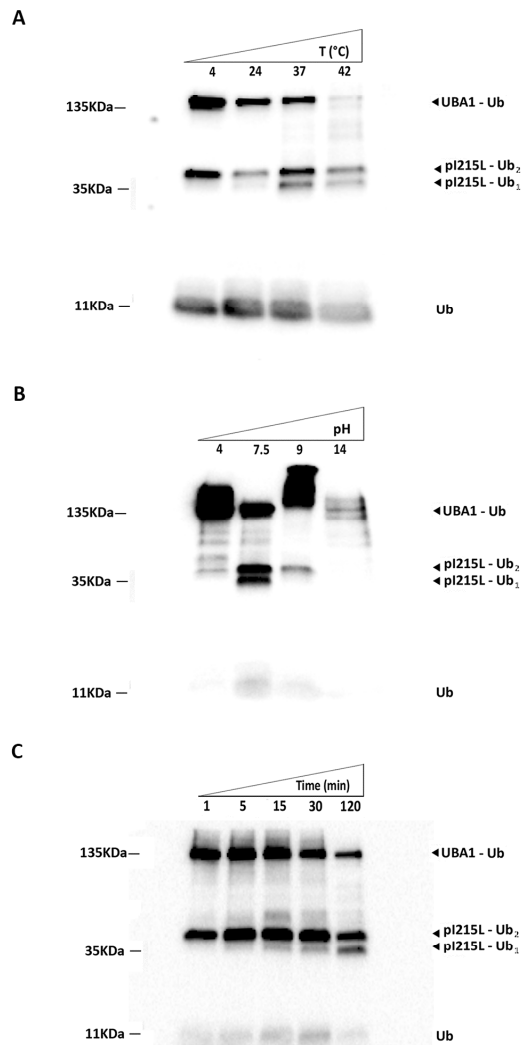

Supplement: 41598_2018_21872_MOESM1_ESM.pdf [file 41598_2018_21872_MOESM1_ESM.pdf]
